# Supplementary material
Source: PubMed Central journal article supplement (PMC2242680)

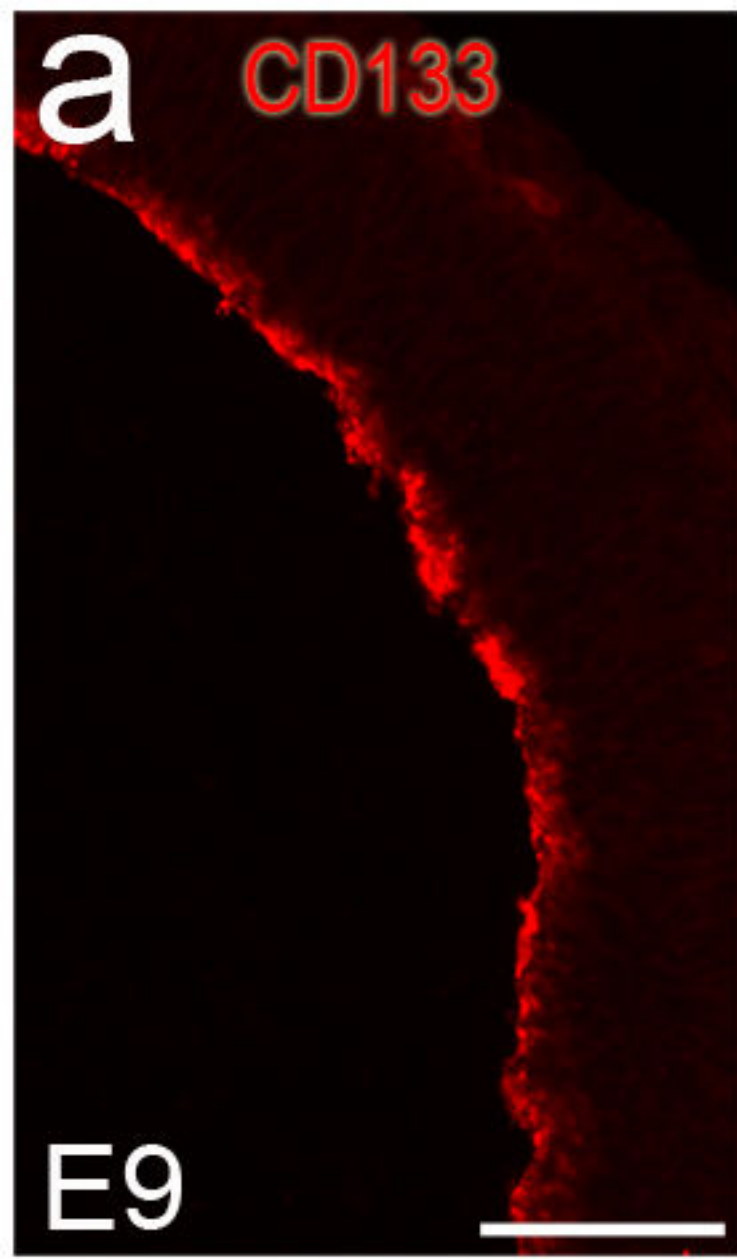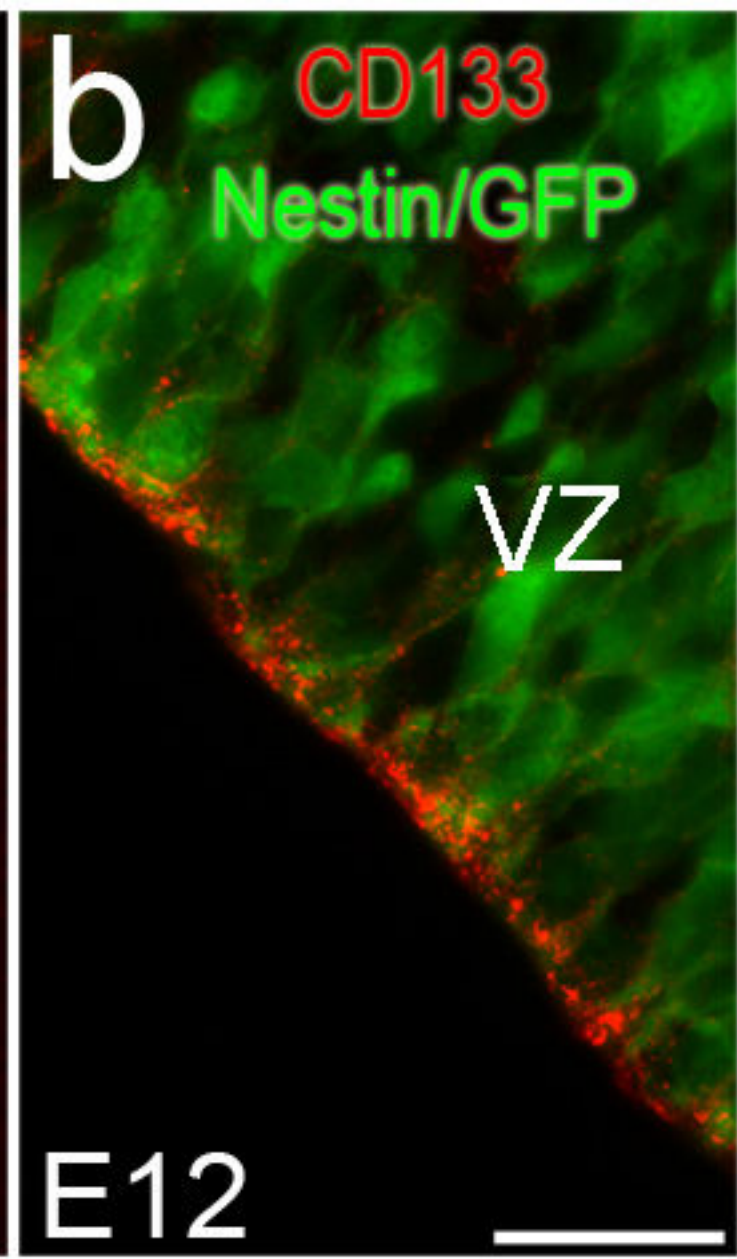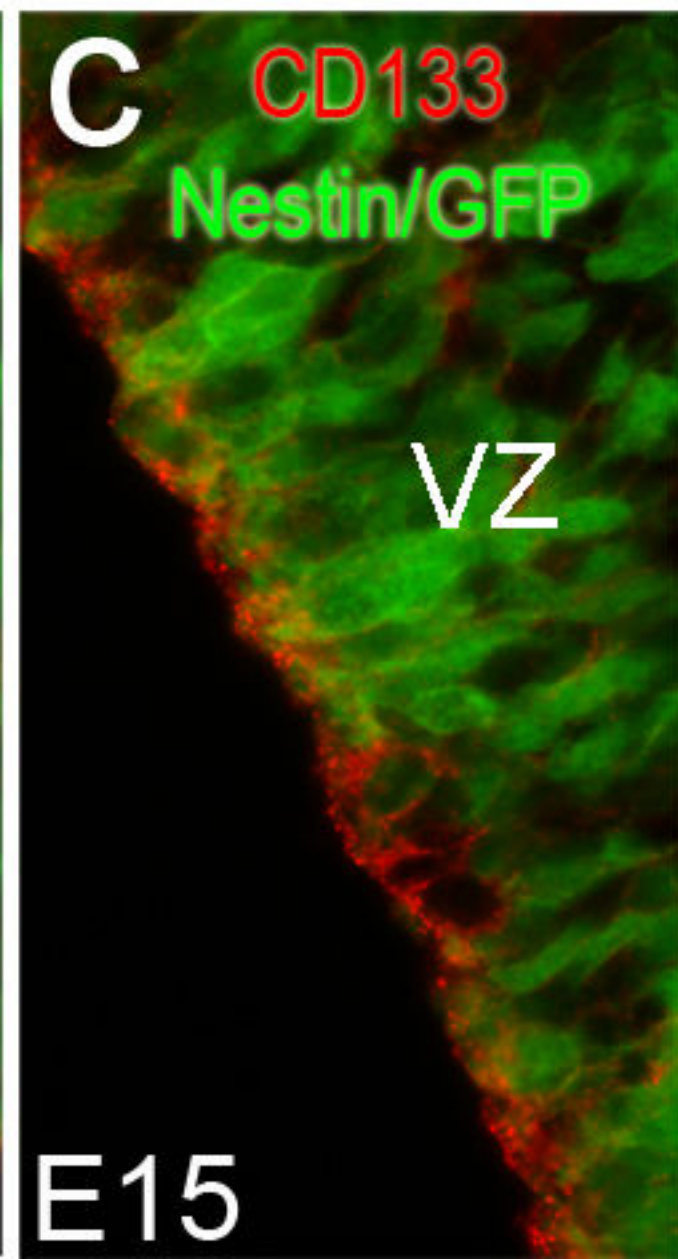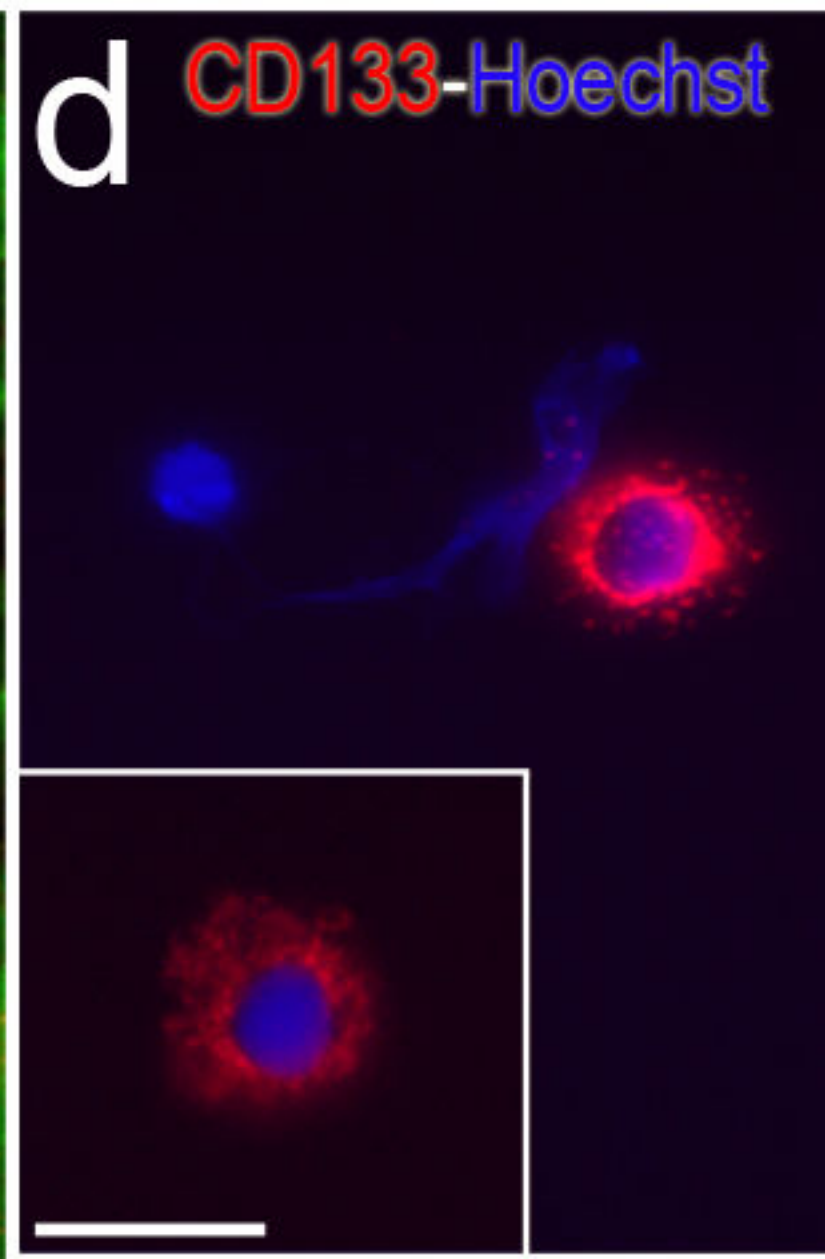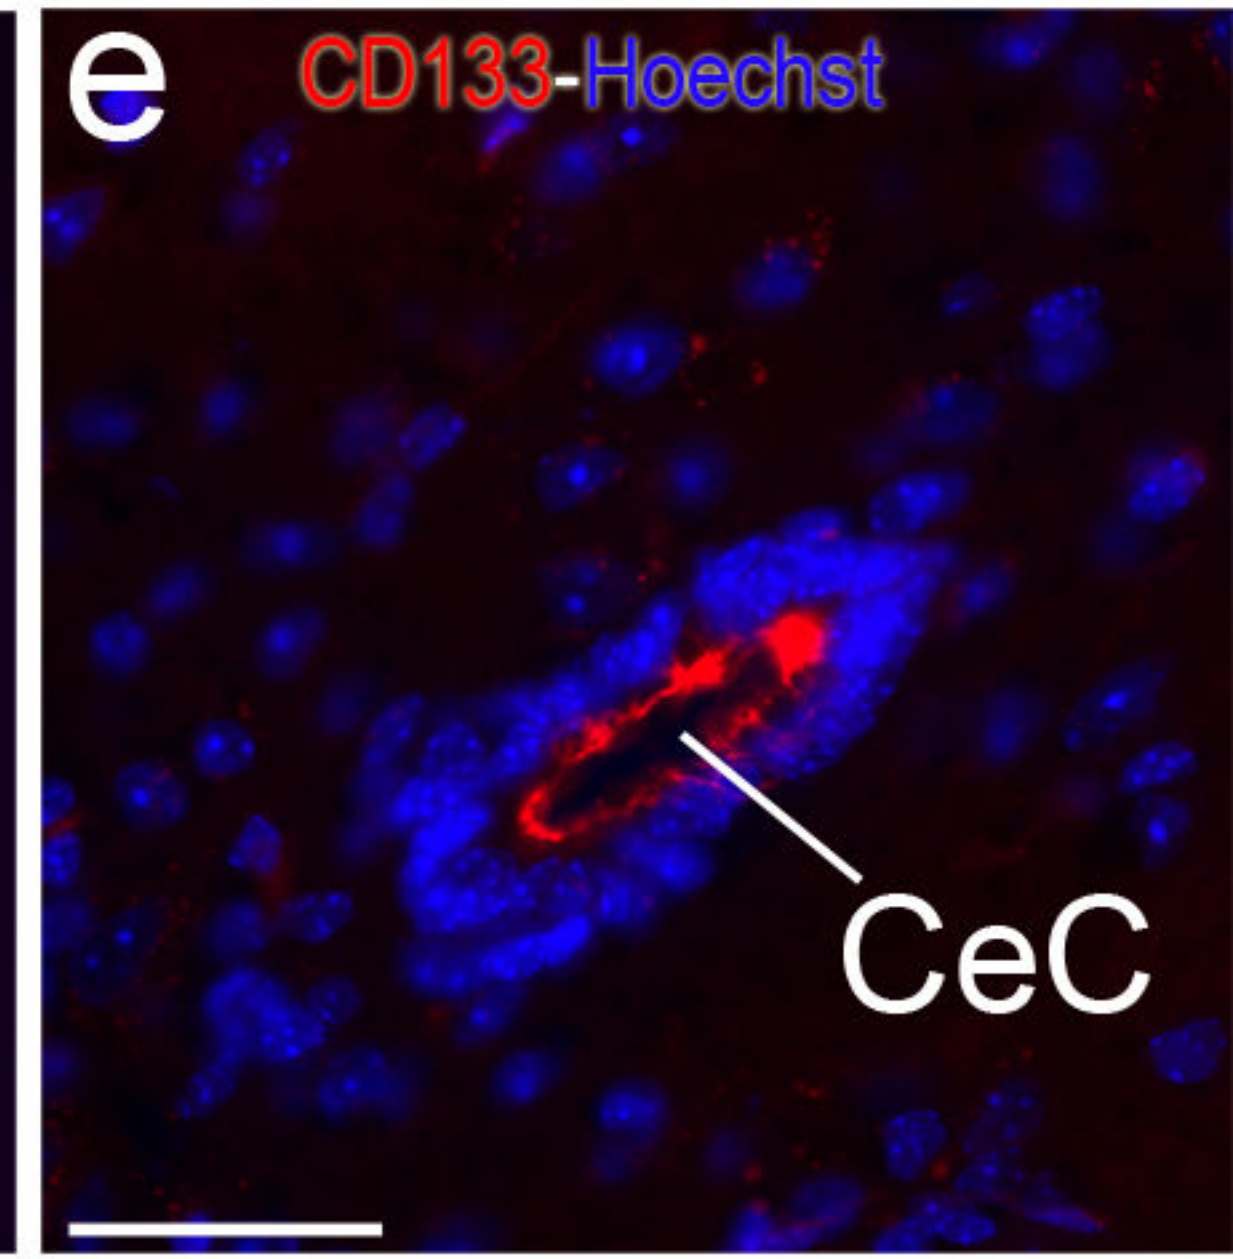

Supplement: pnas_0710000105_1.pdf [file pnas_0710000105_1.pdf]

**a**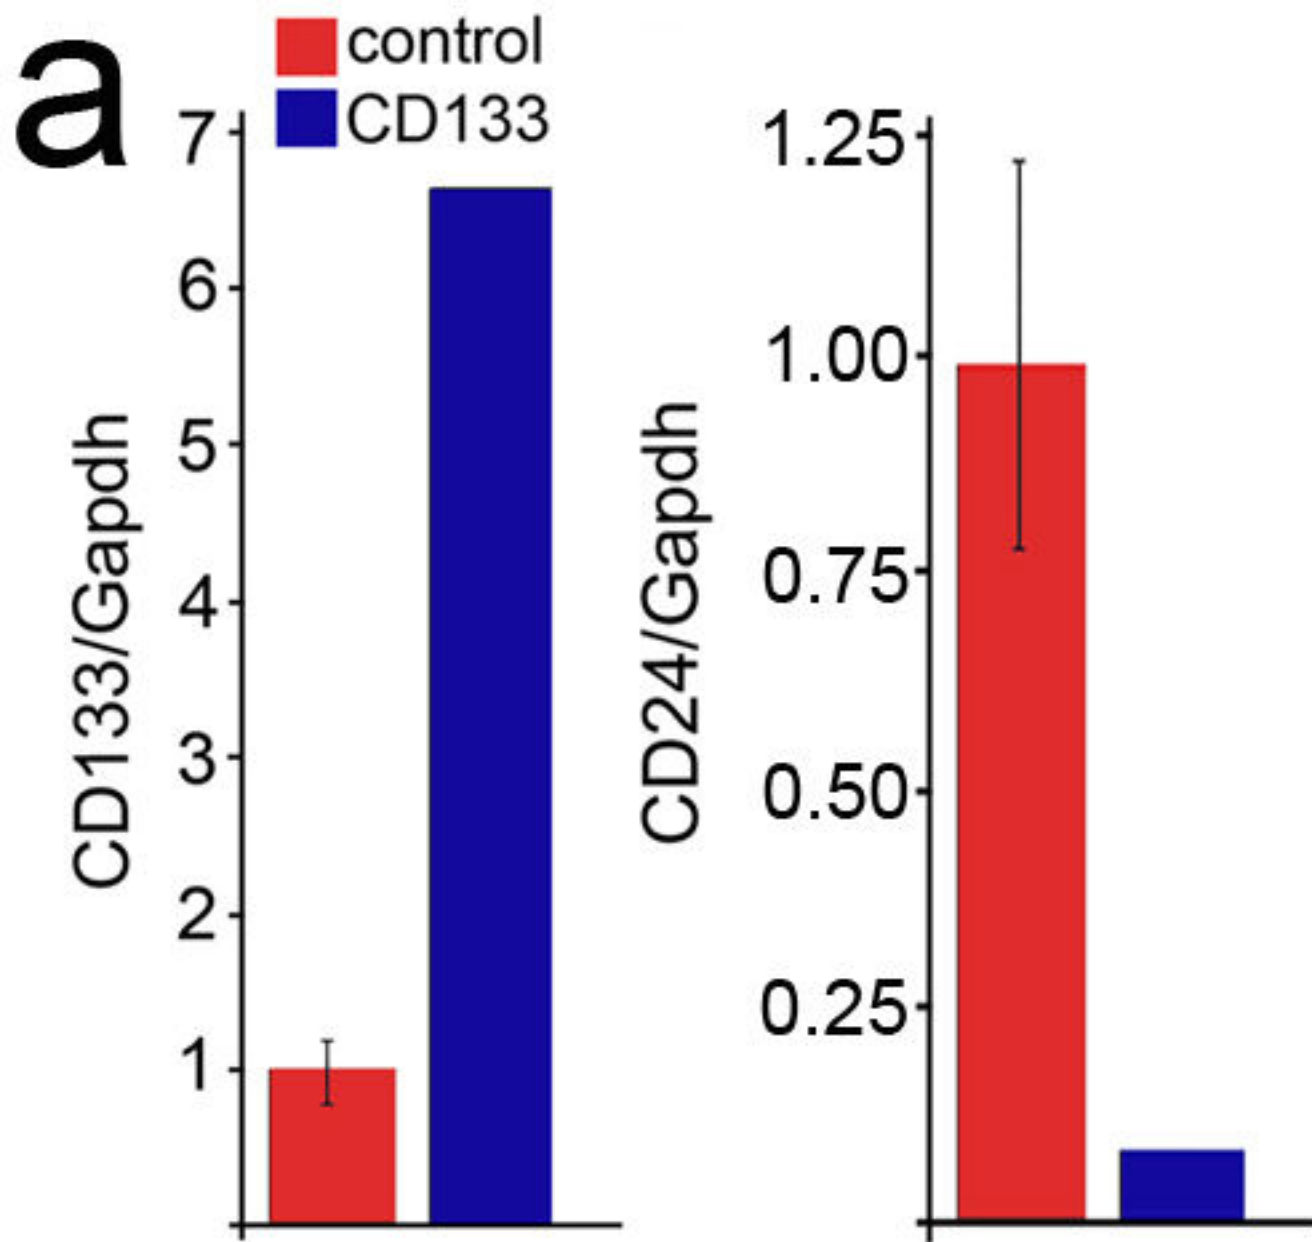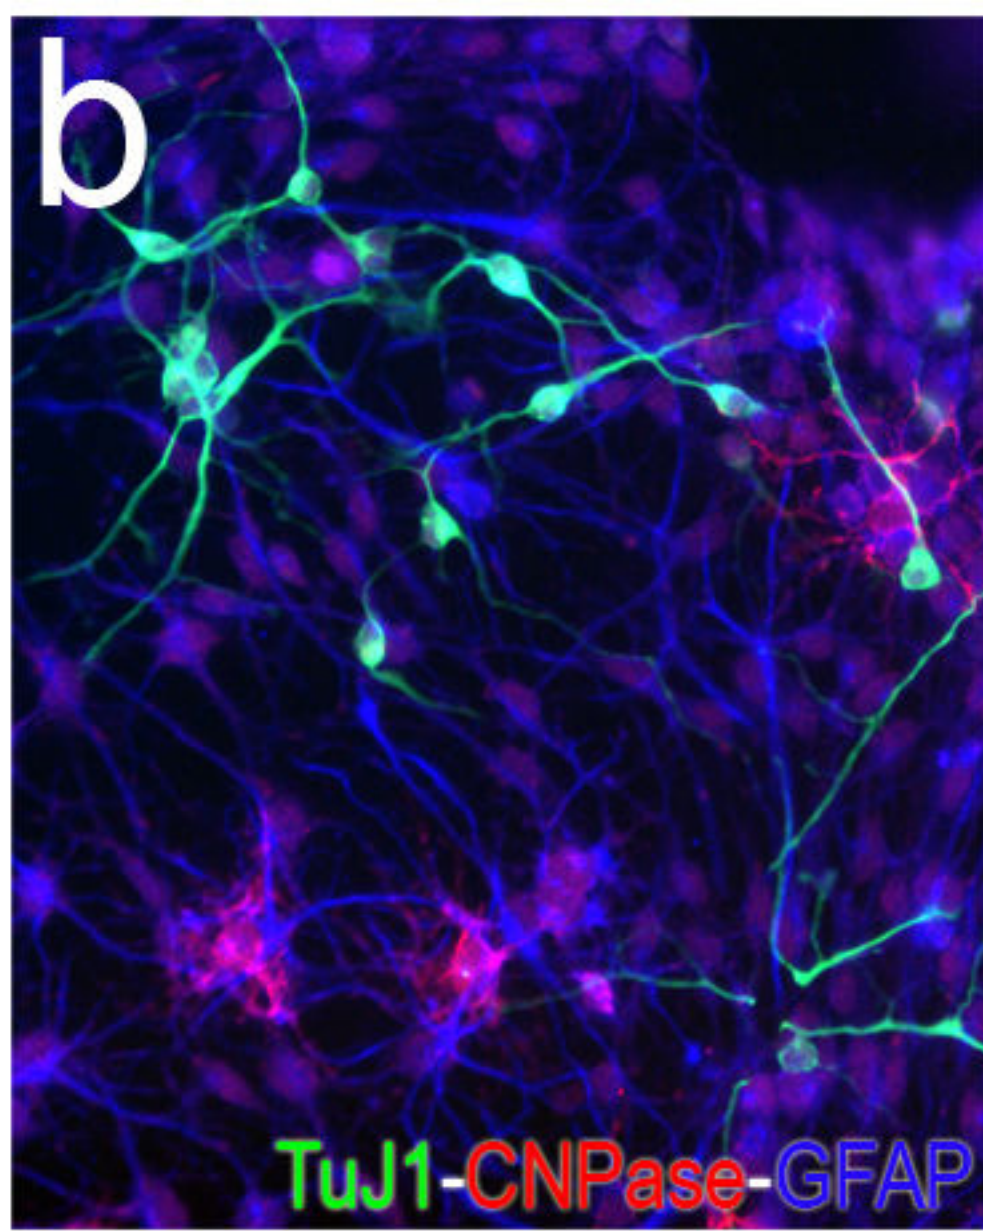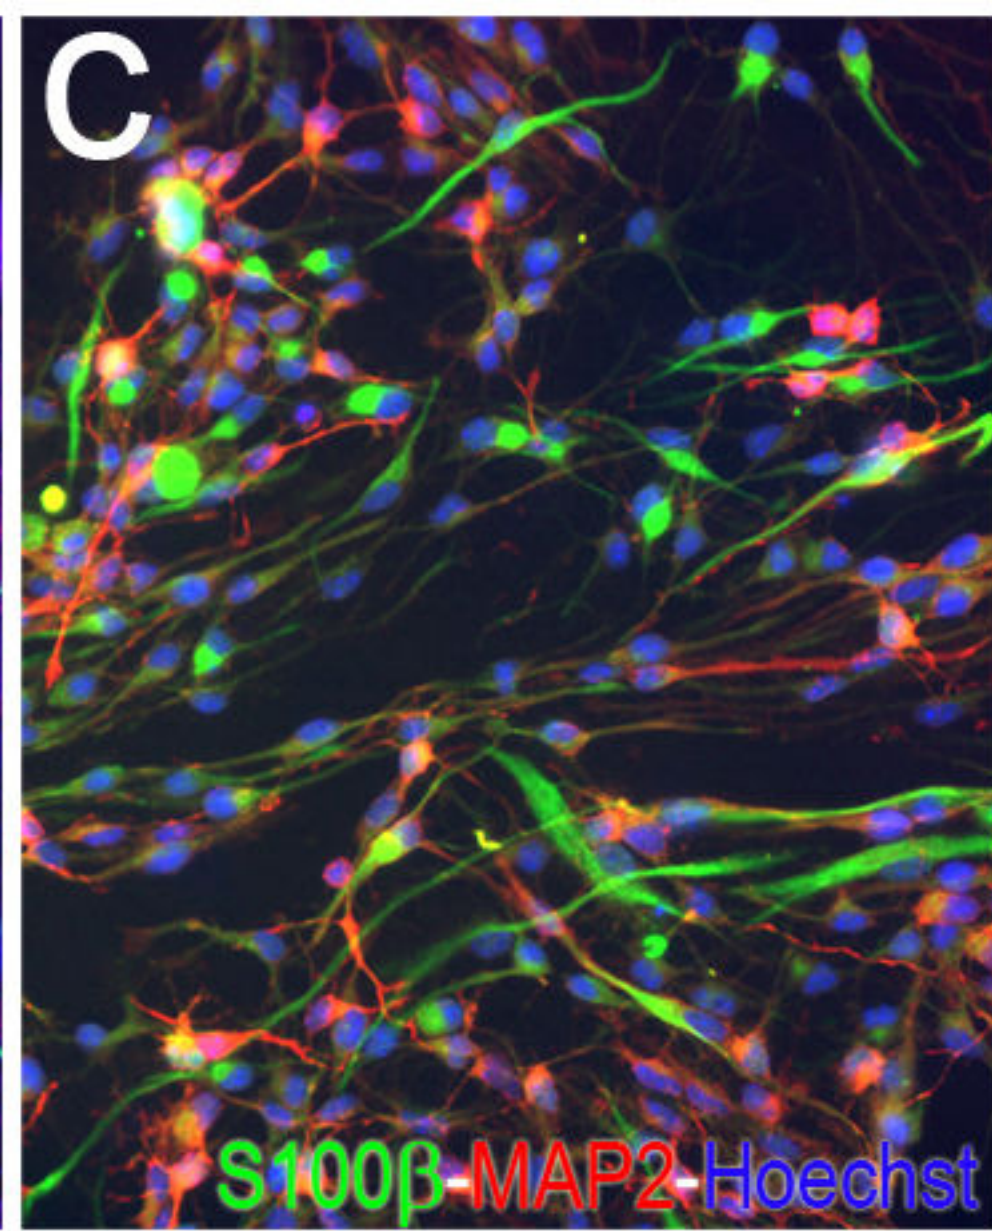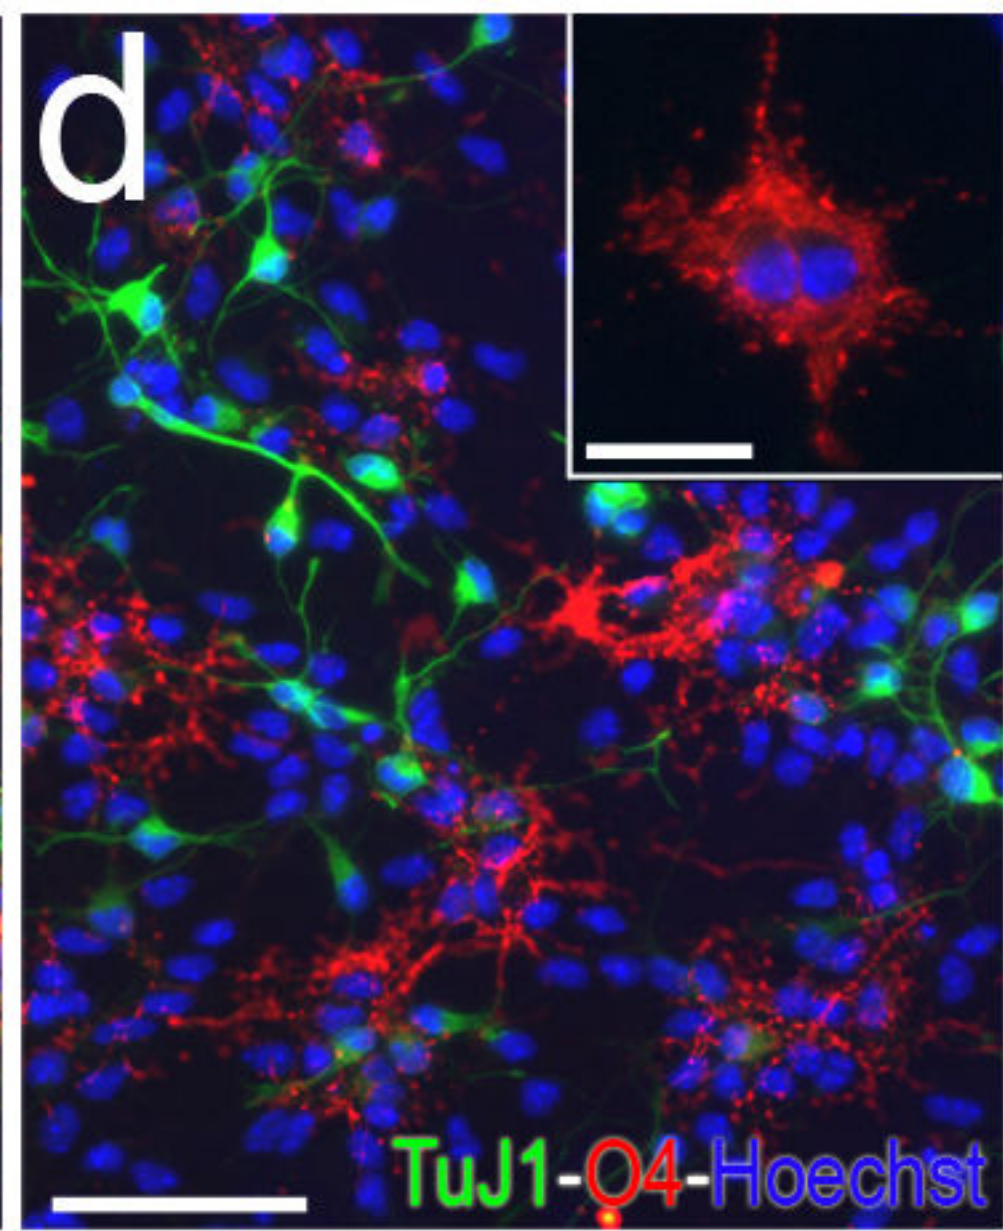

Supplement: pnas_0710000105_2.pdf [file pnas_0710000105_2.pdf]

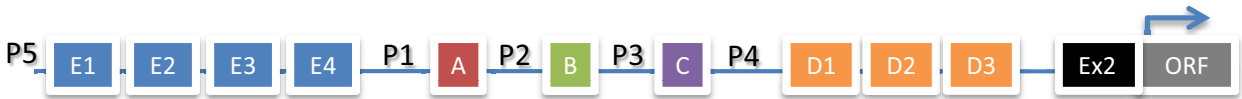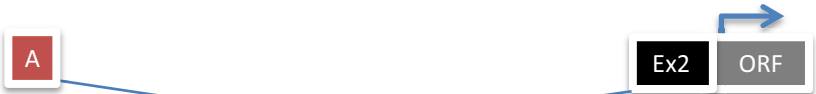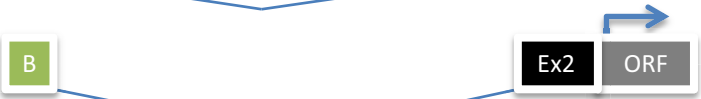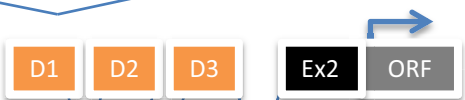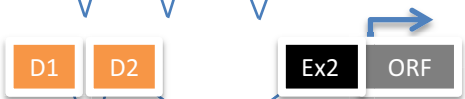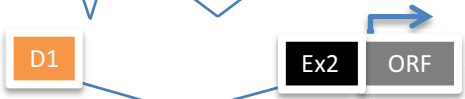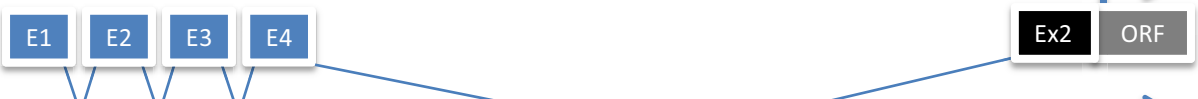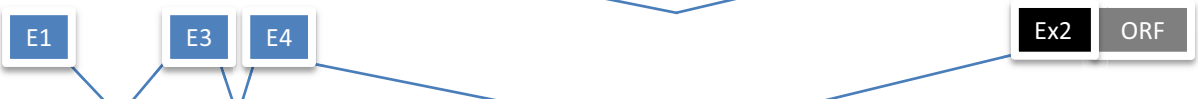

Supplement: pnas_0710000105_3.pdf [file pnas_0710000105_3.pdf]

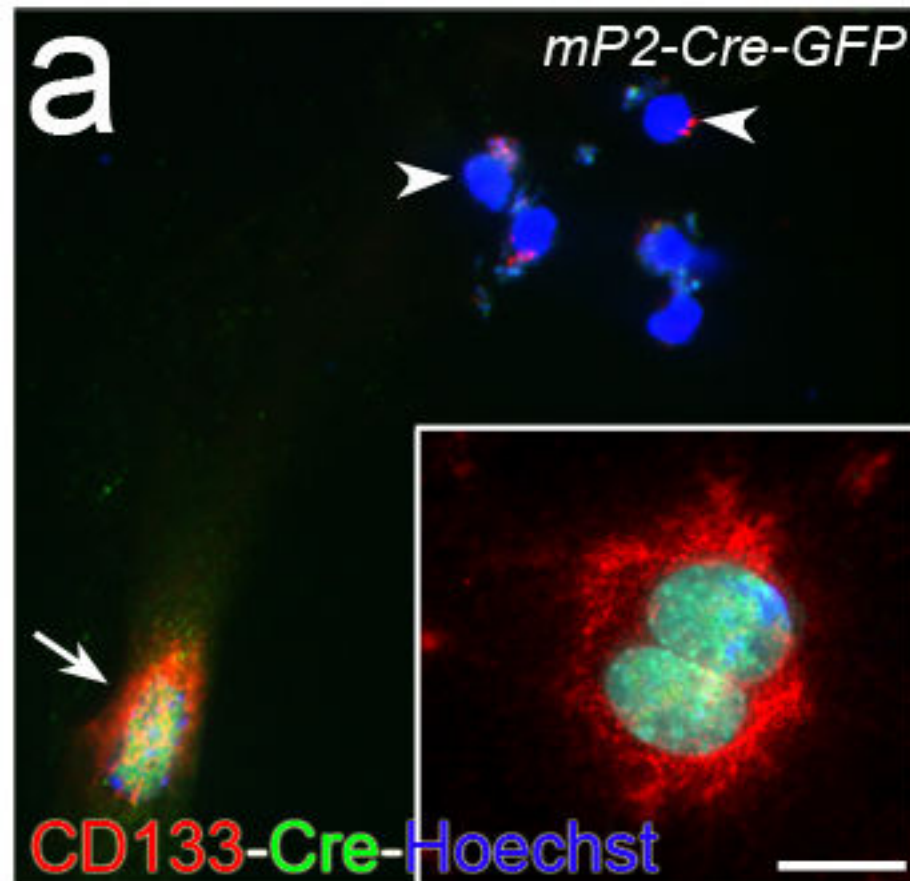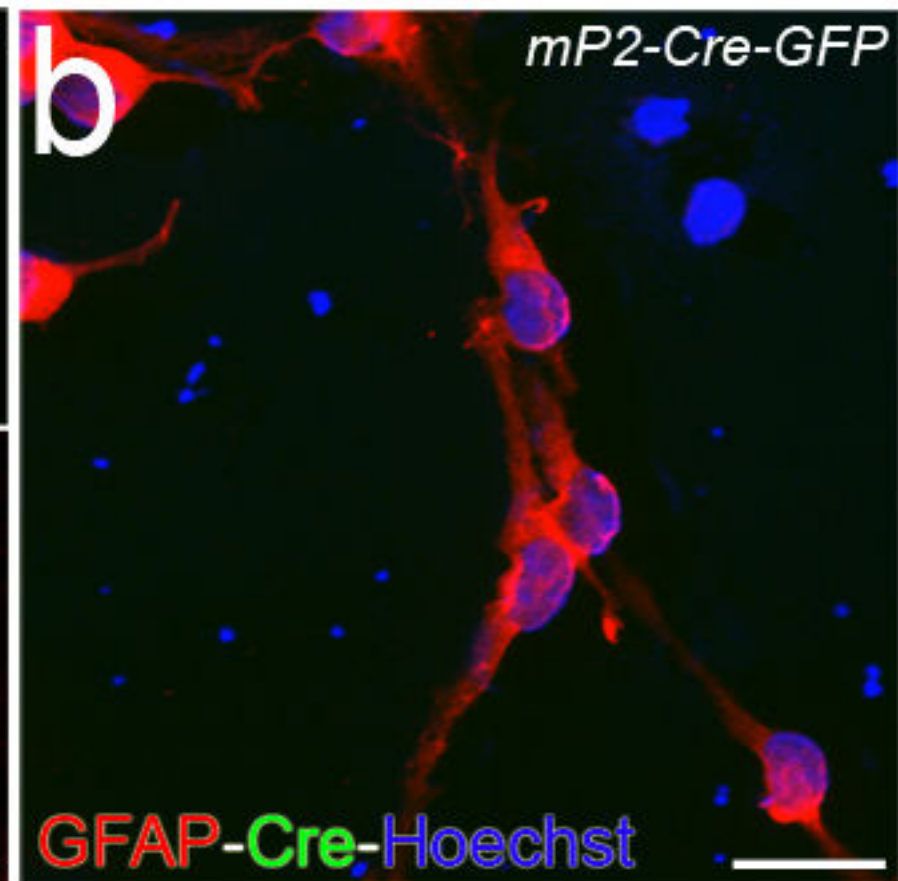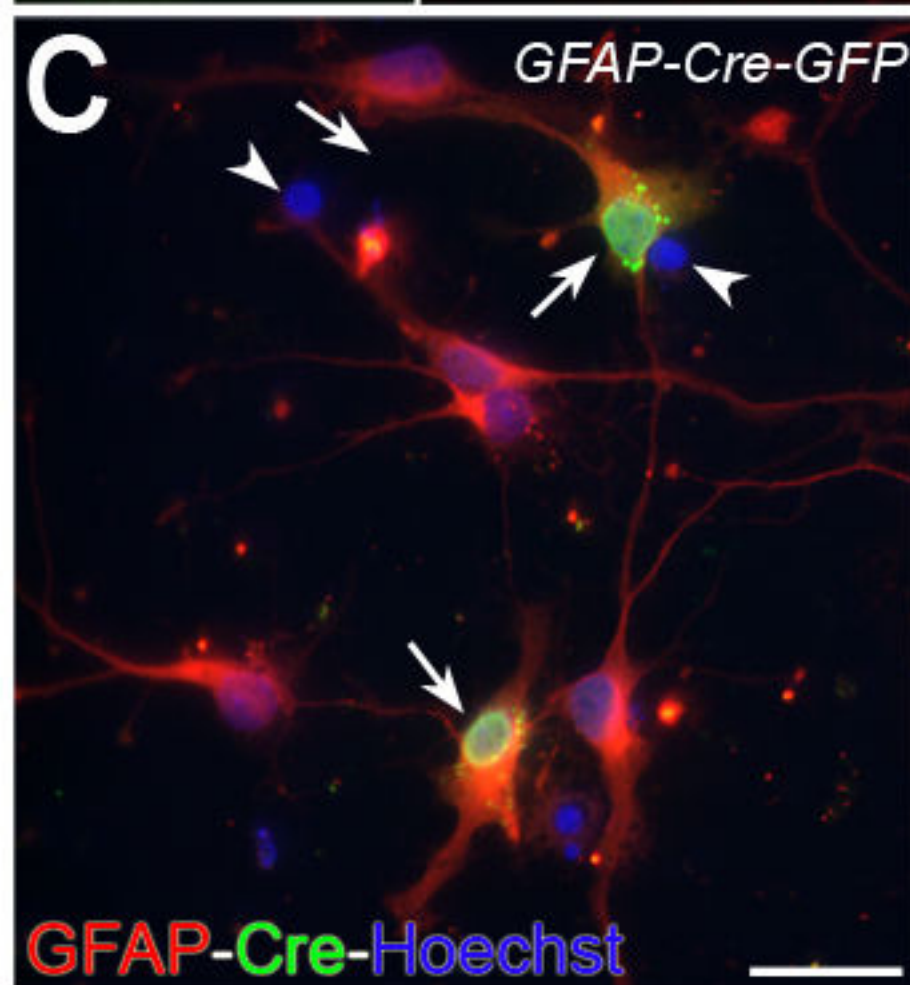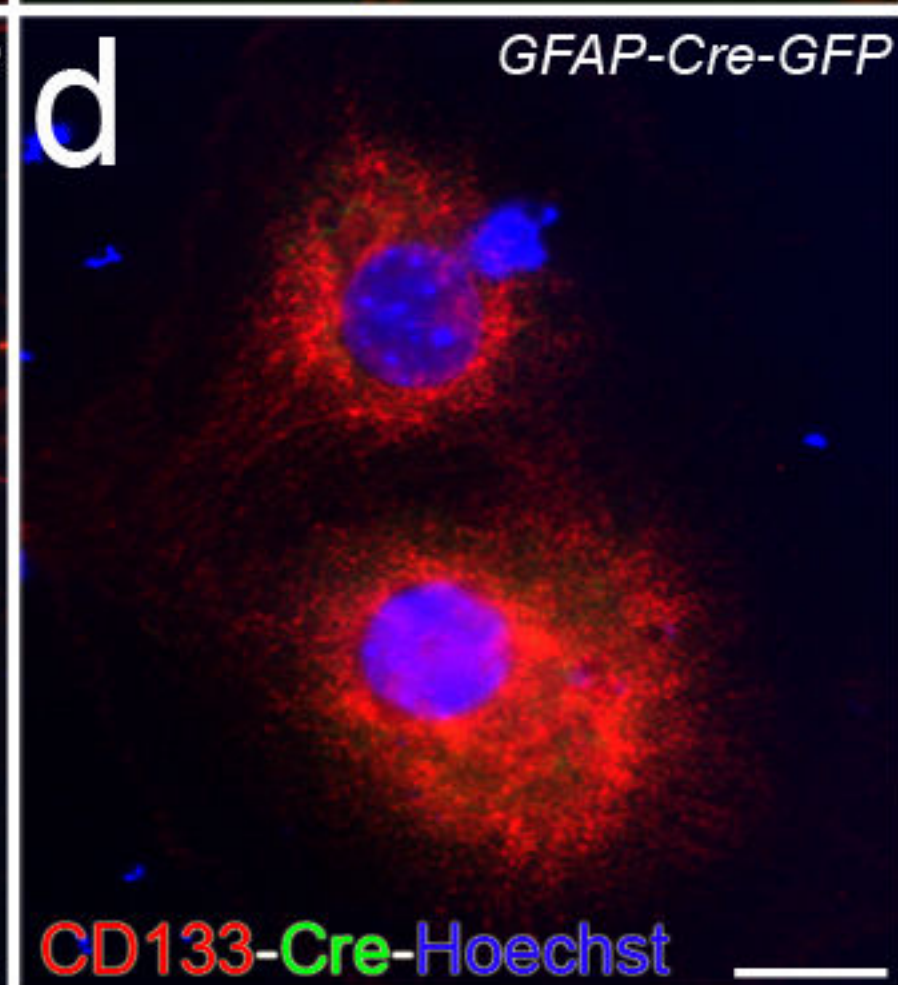

Supplement: pnas_0710000105_4.pdf [file pnas_0710000105_4.pdf]

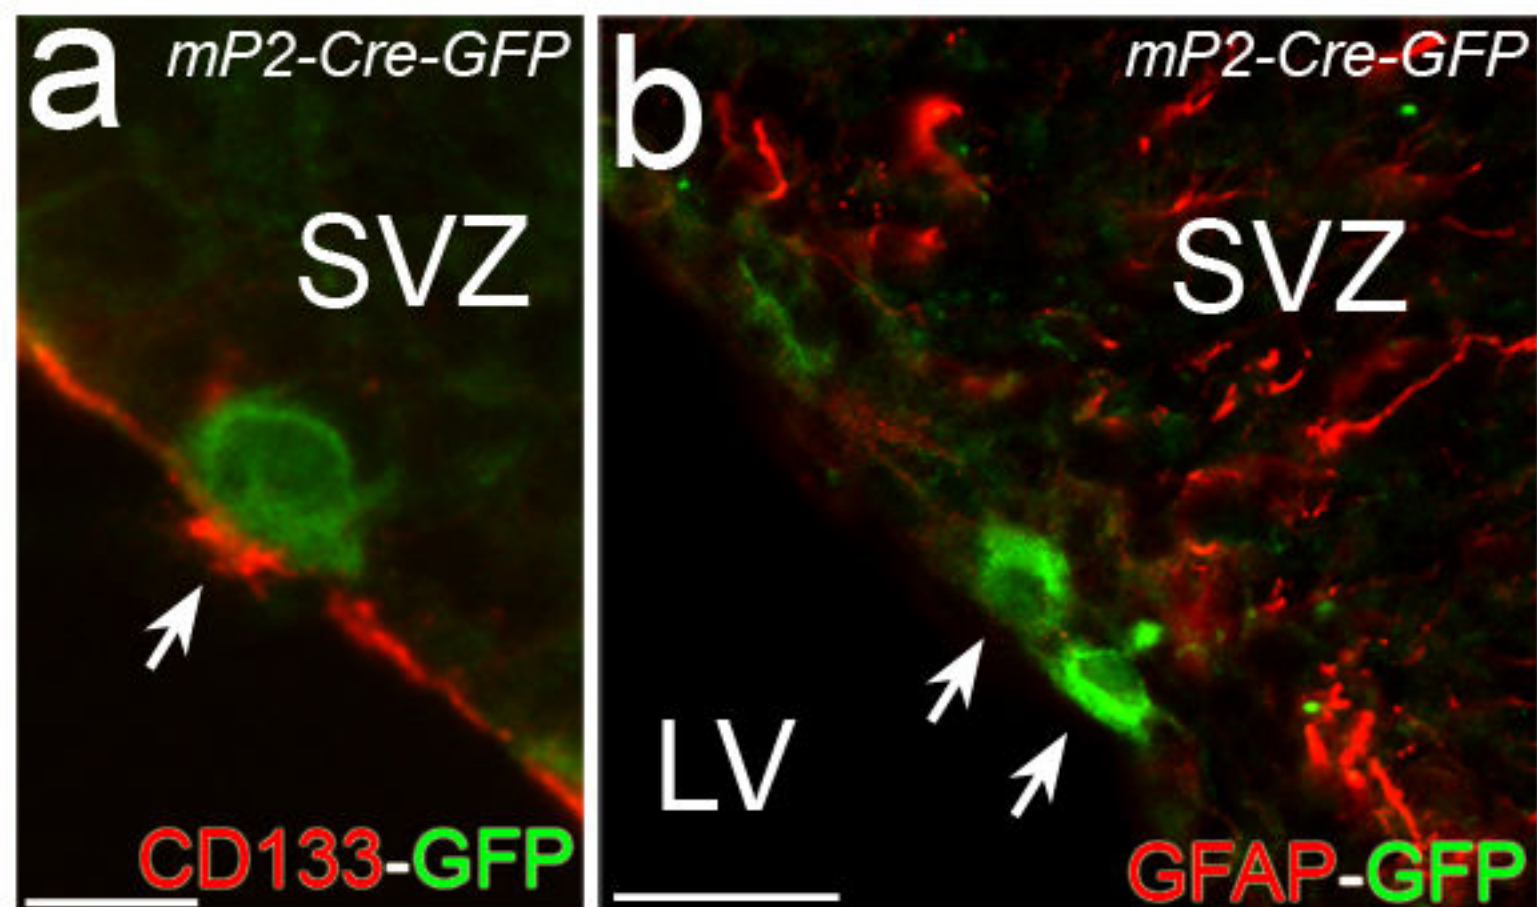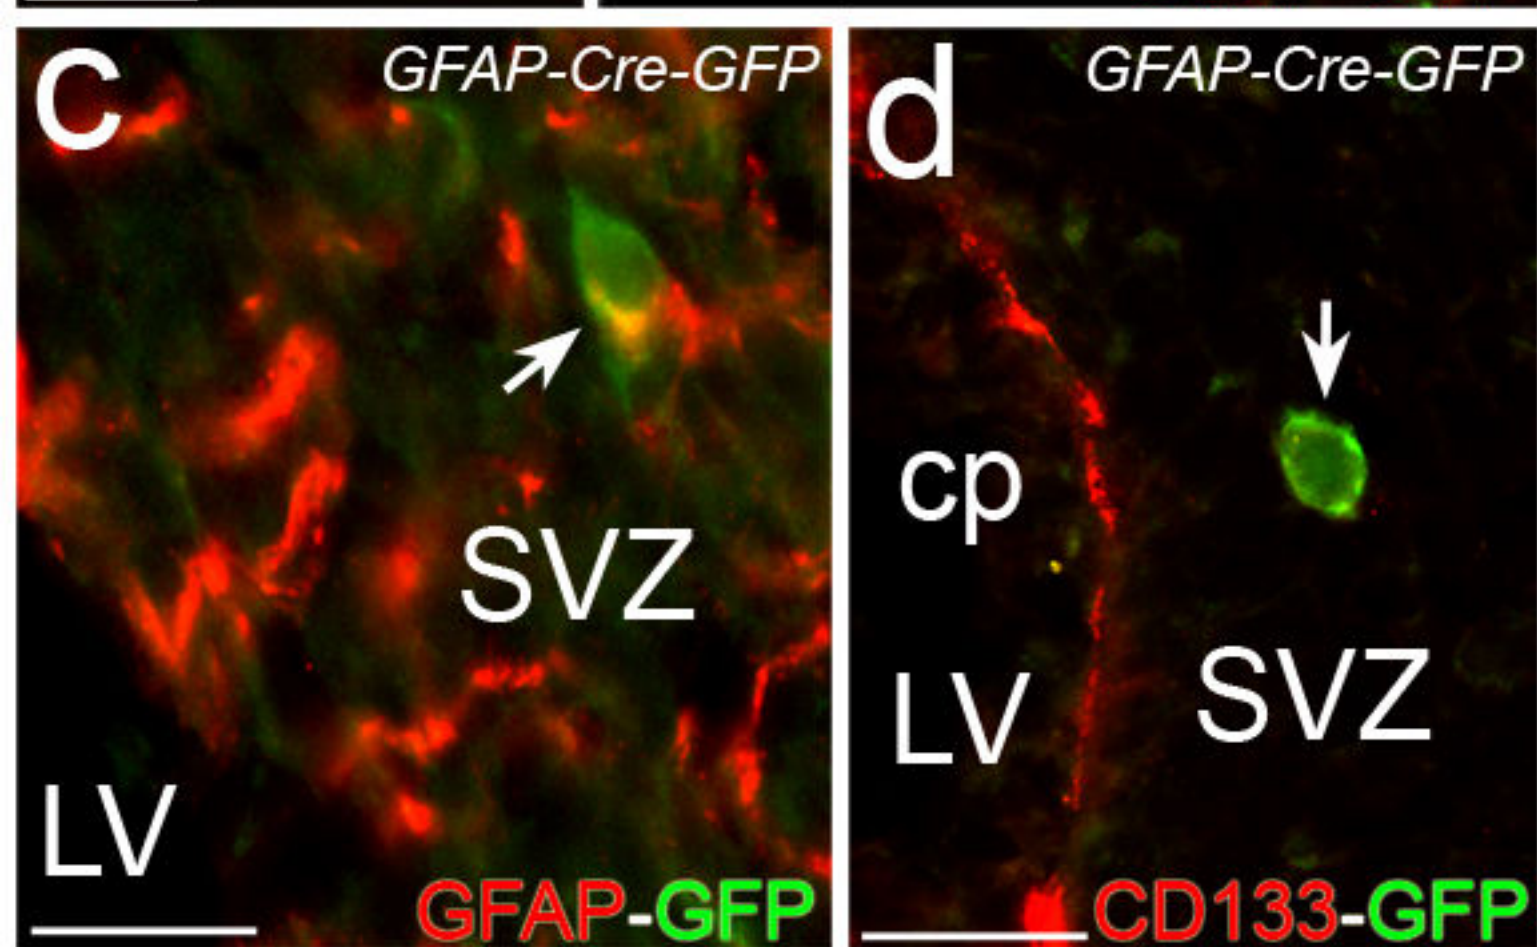

Supplement: pnas_0710000105_5.pdf [file pnas_0710000105_5.pdf]

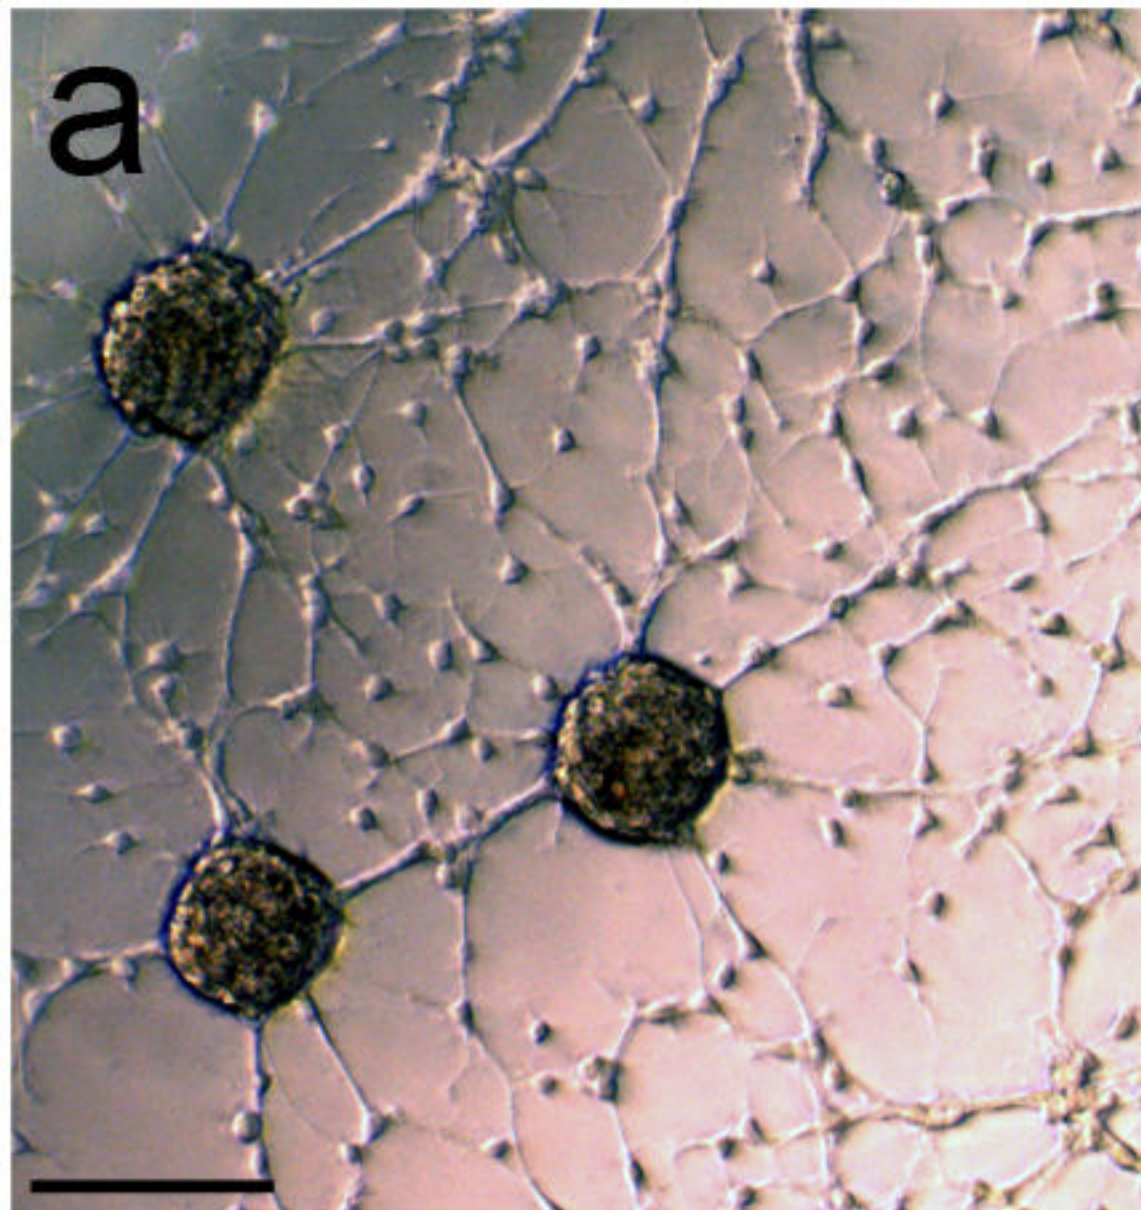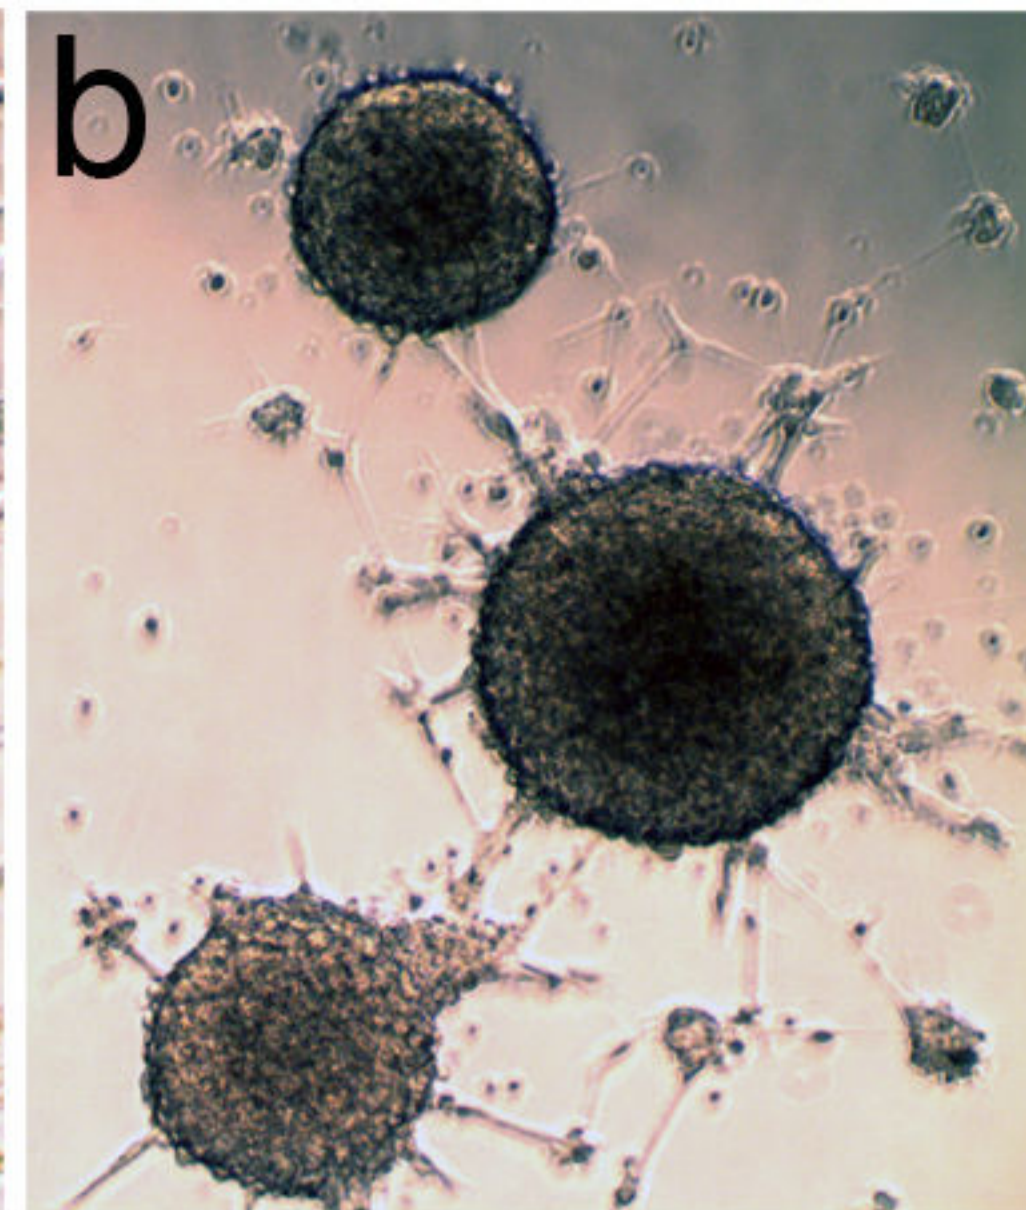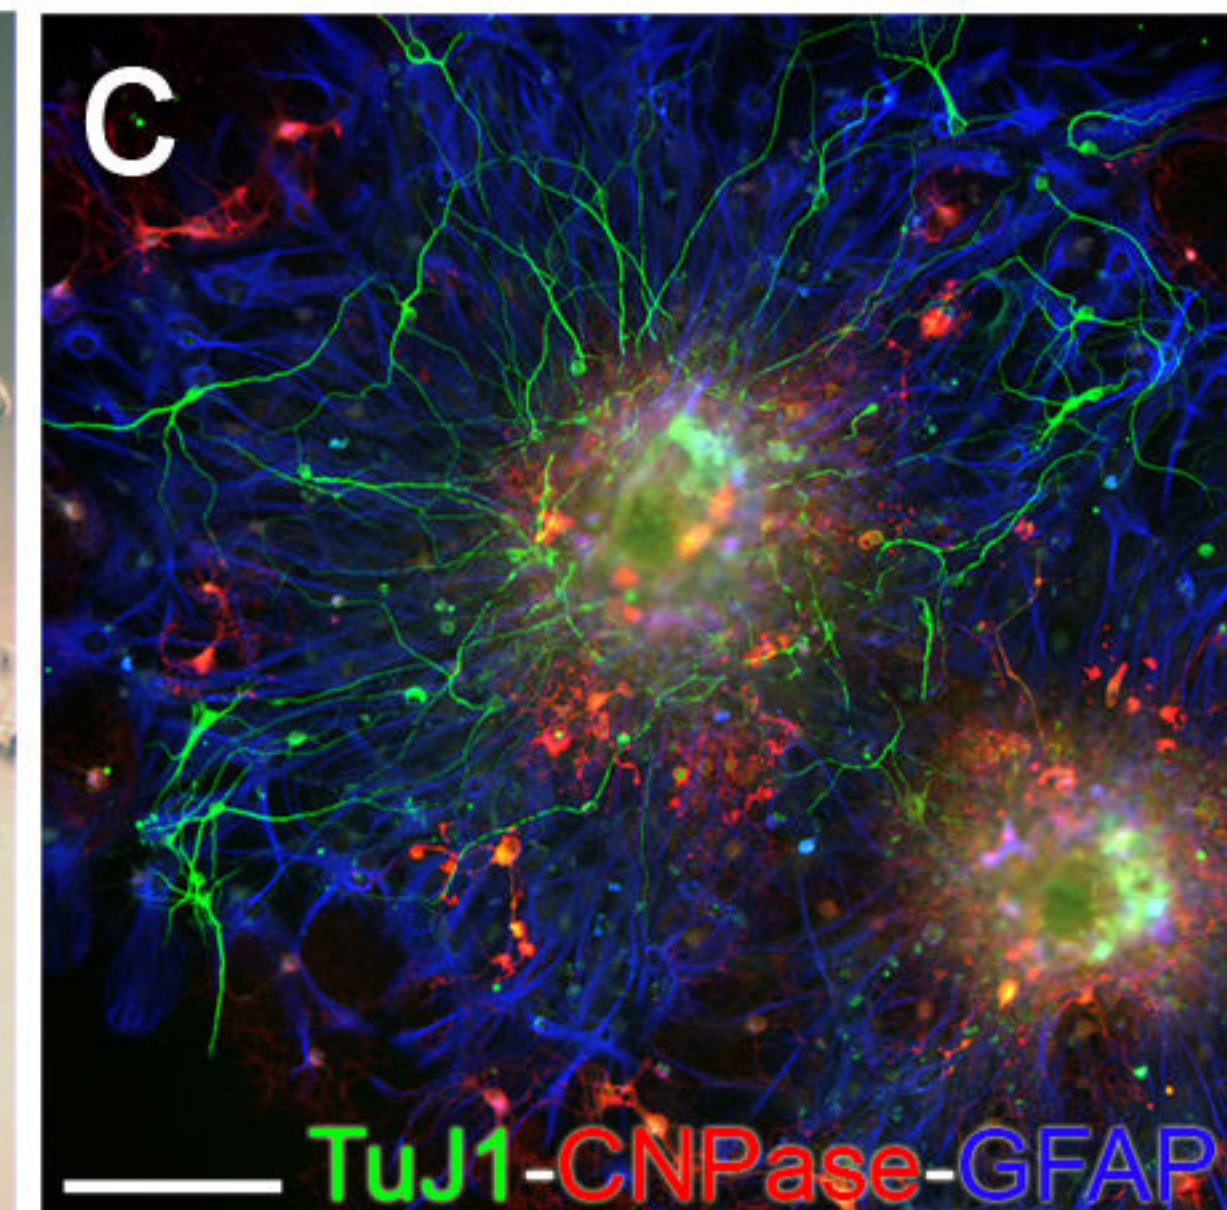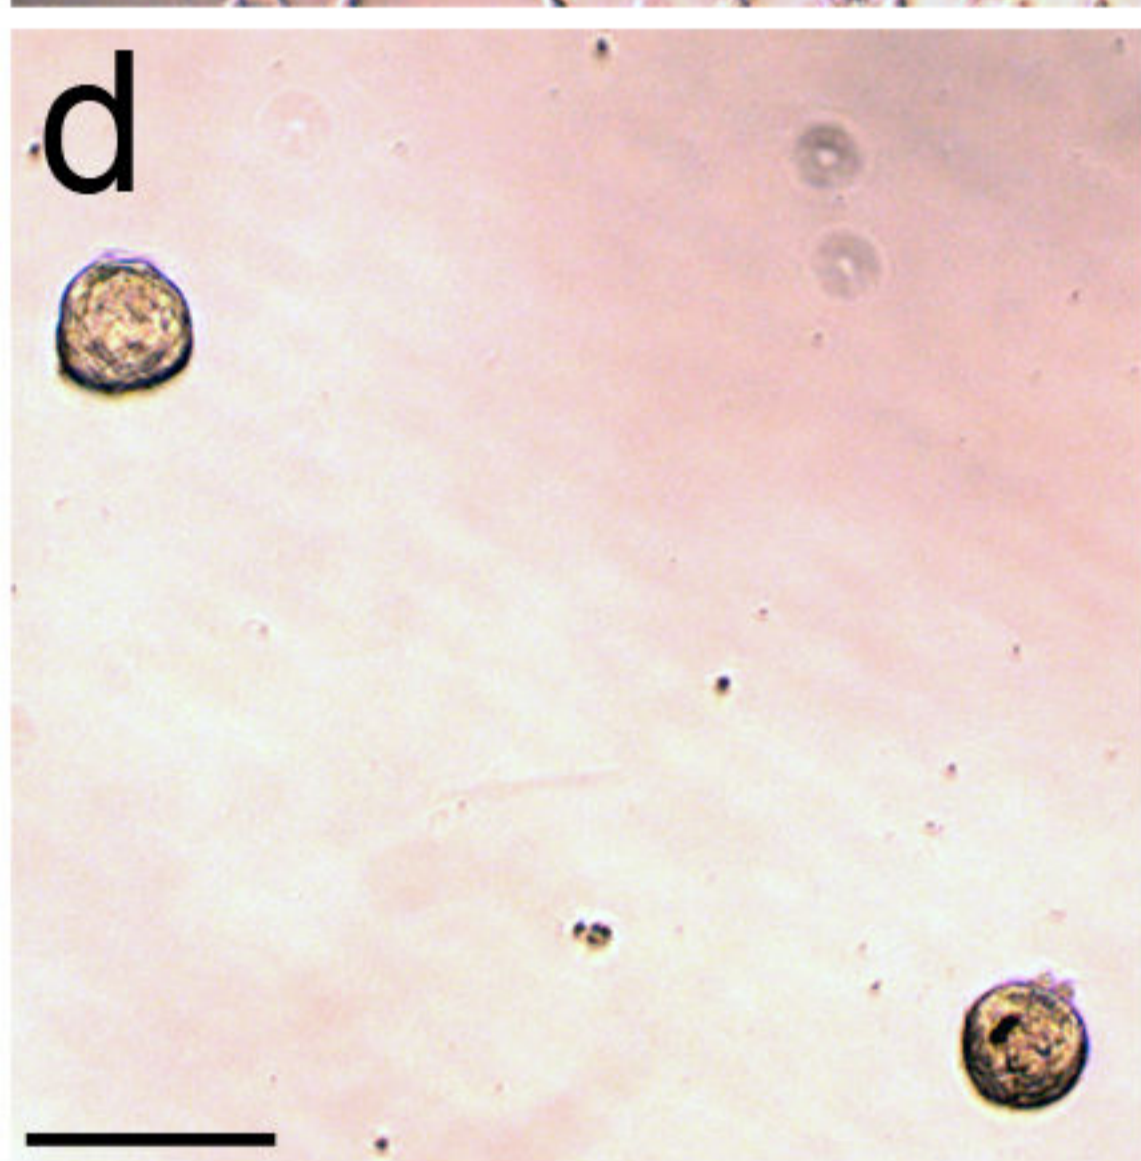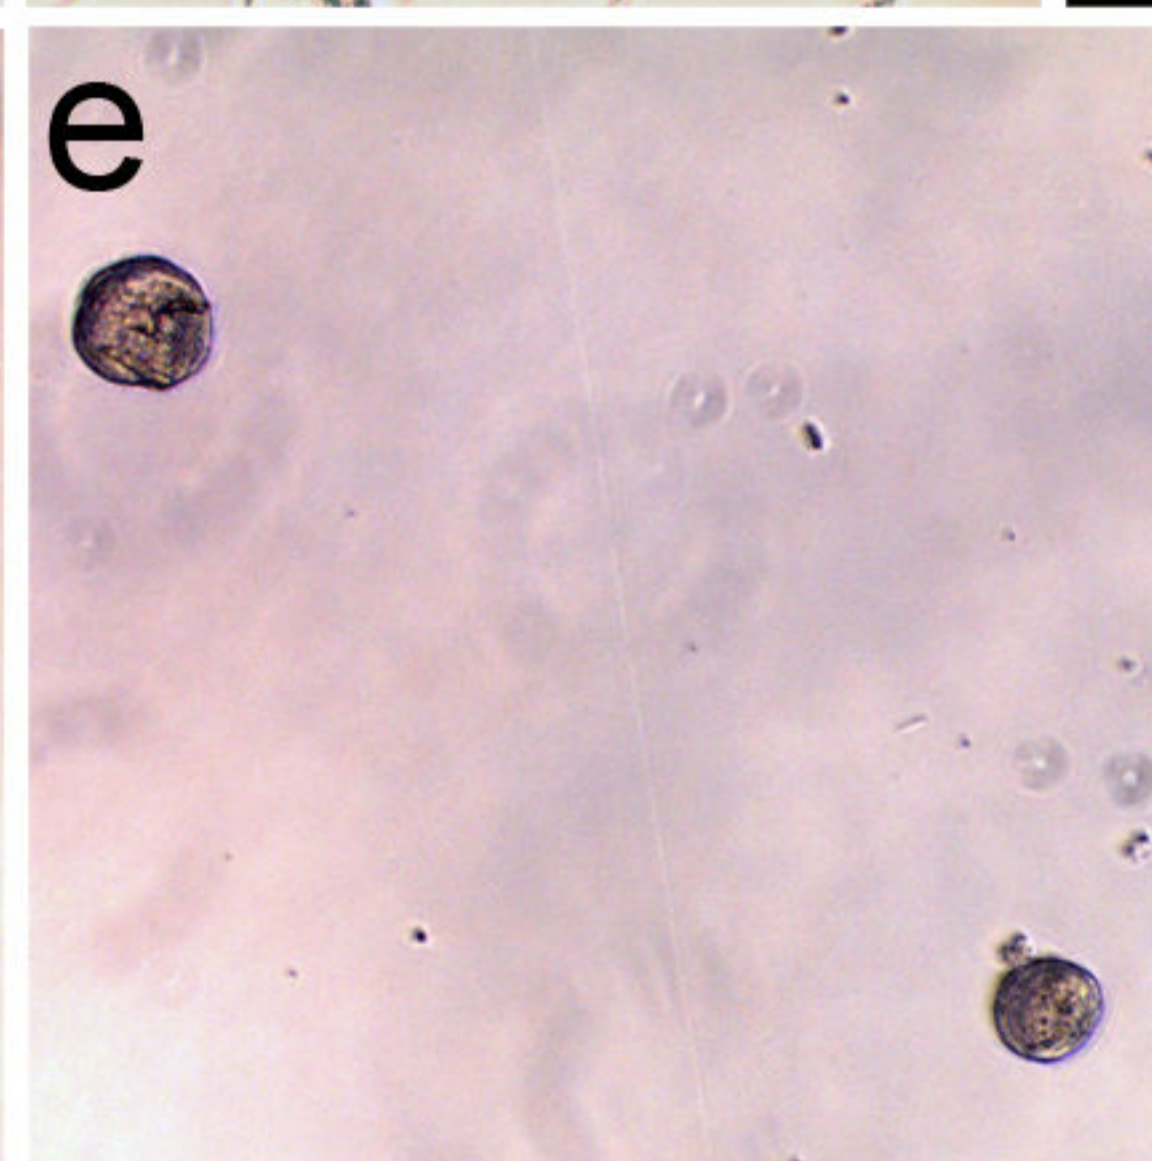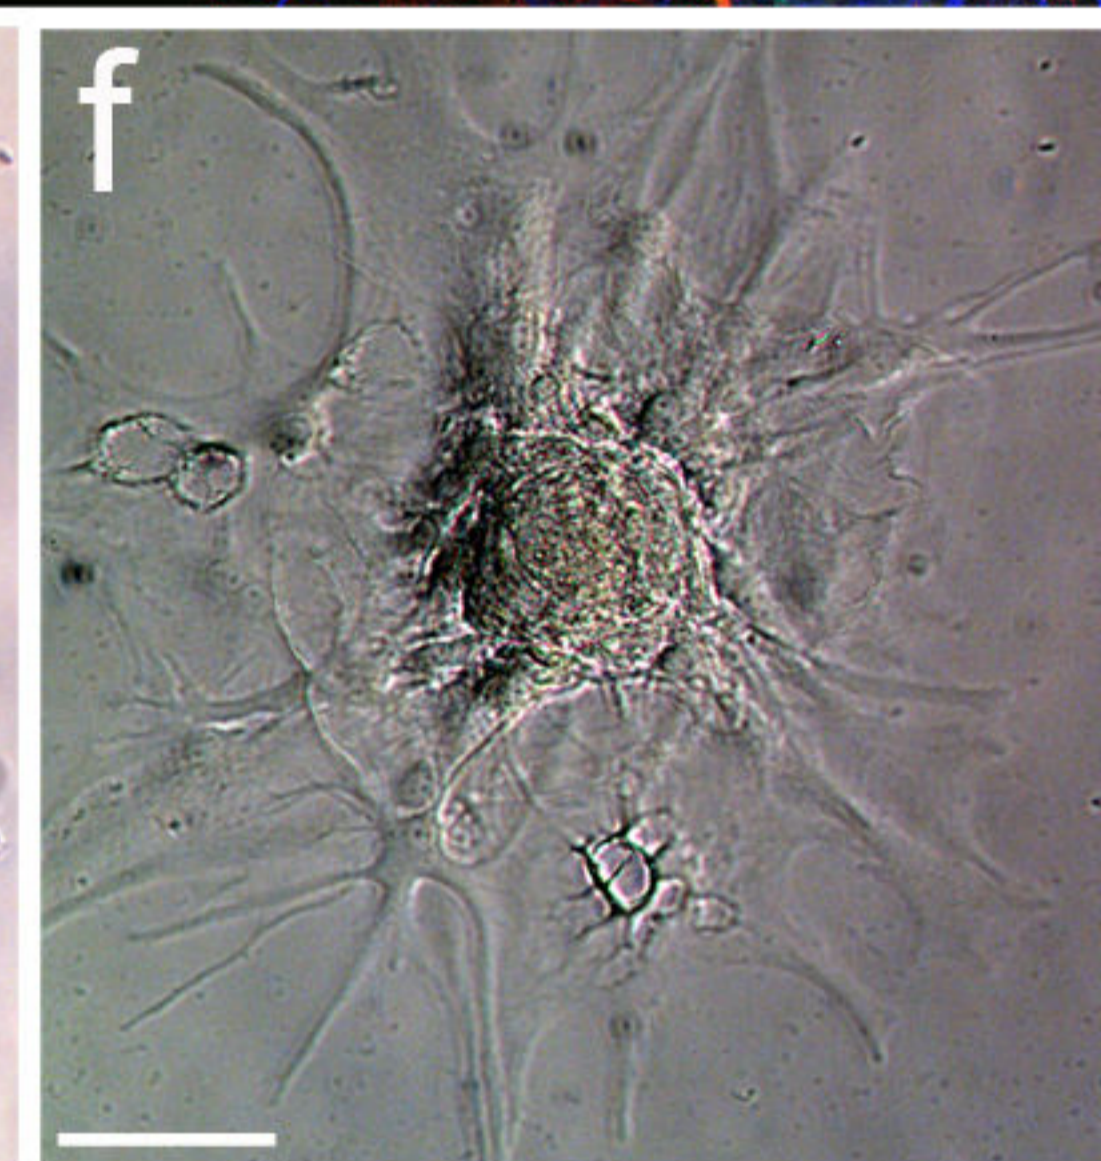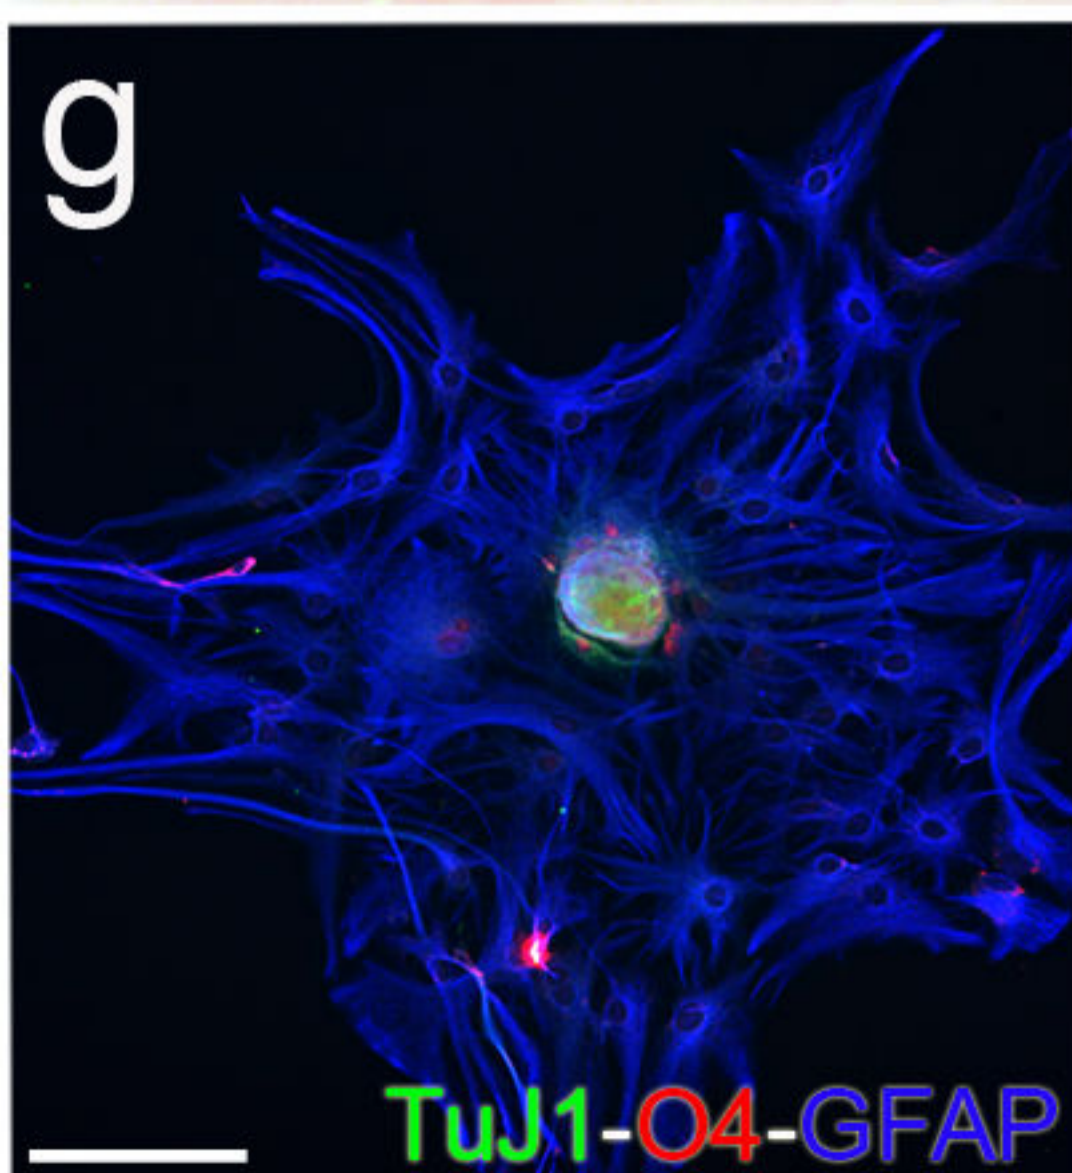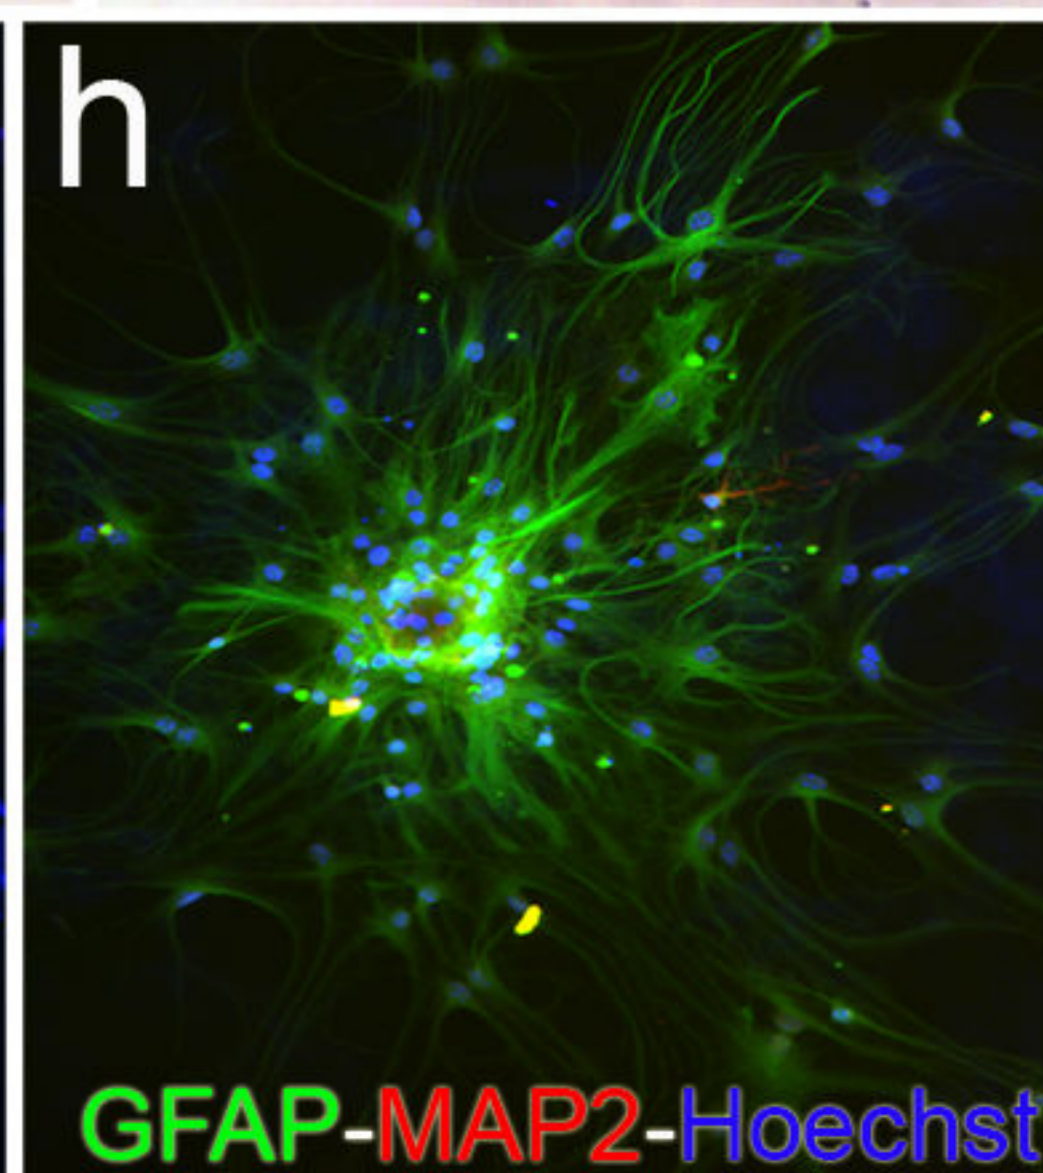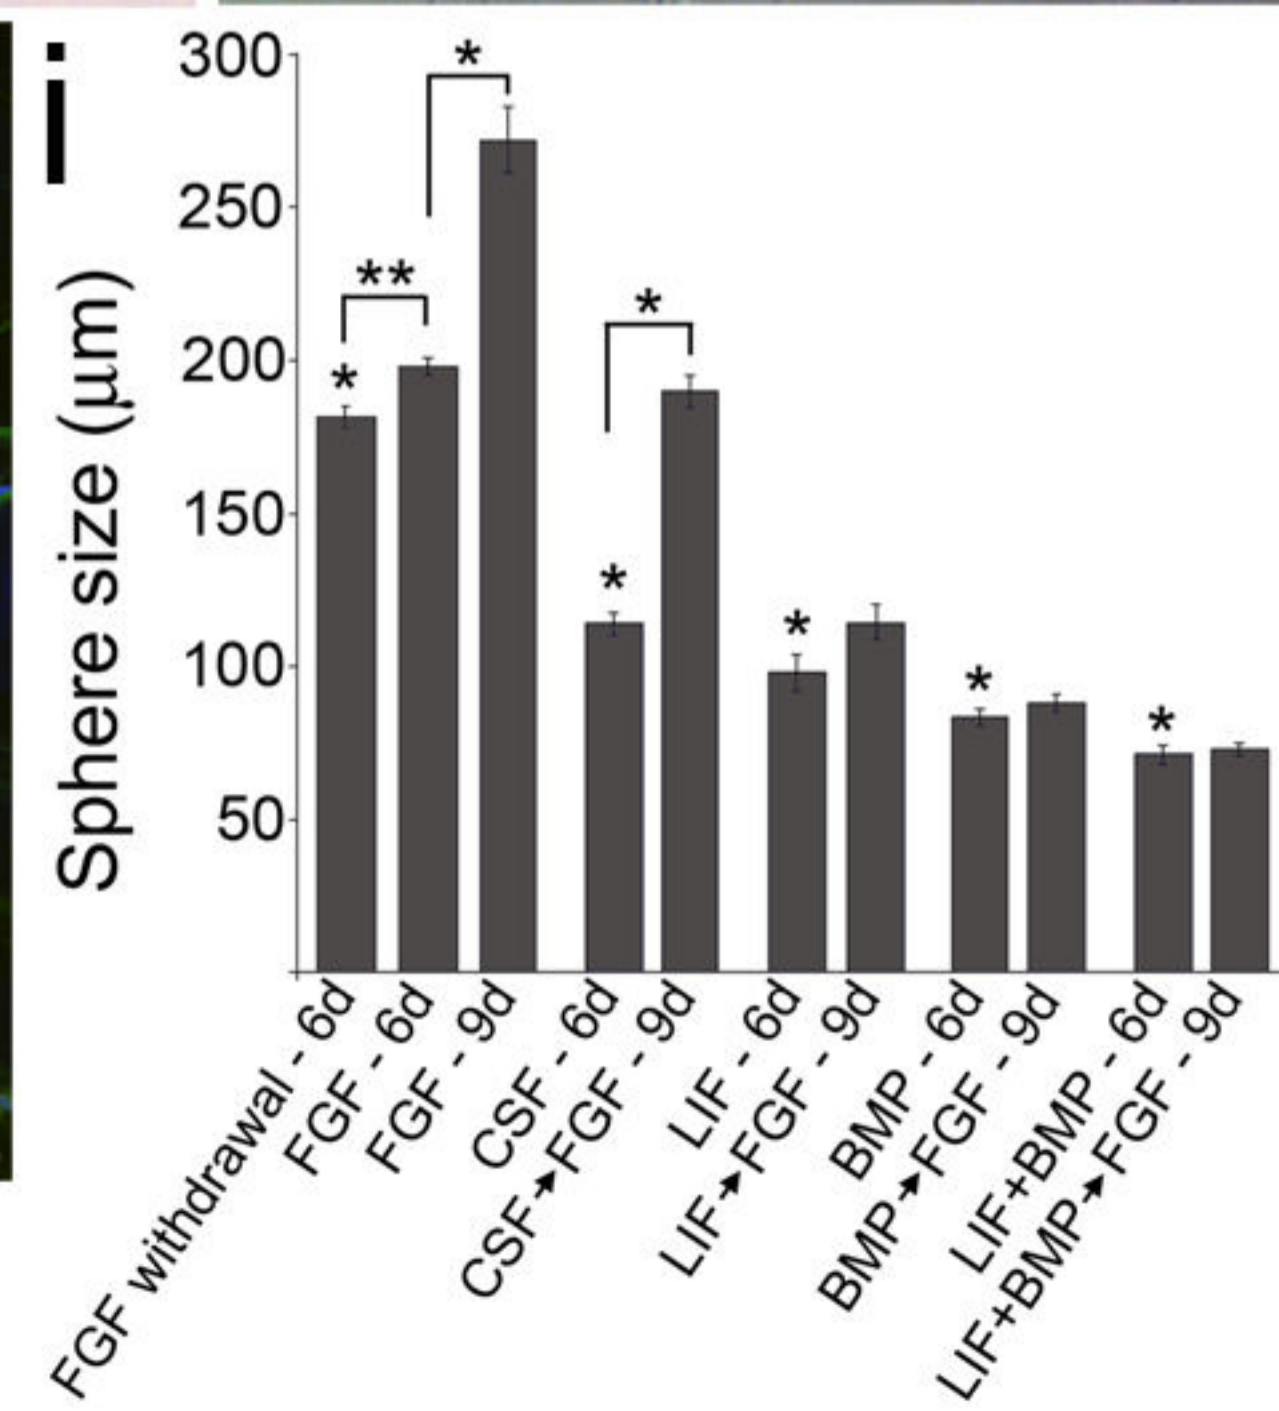

Supplement: pnas_0710000105_6.pdf [file pnas_0710000105_6.pdf]
